# Supplementary material
Source: Elsevier journal article supplement (https://www.sciencedirect.com/science/article/pii/S2238785418309384)
Supplement: mmc1 [file S2238785418309384:mmc1.docx]

**Supporting Documents**

**Fig. 1S.** Bode plots (a) impedance of the interface and (b) degree of phase angle obtained for (1) sample 1, (2) sample 2, and (3) sample 3 from the extrudate after 1h immersion in 3.5% NaCl solution.

**Fig. 2S.** Bode plots (a) impedance of the interface and (b) degree of phase angle obtained for (1) sample 1, (2) sample 2, and (3) sample 3 from the extrudate after 12 h immersion in 3.5% NaCl solution.

**Fig. 3S.** Bode plots (a) impedance of the interface and (b) degree of phase angle obtained for (1) sample 1, (2) sample 2, and (3) sample 3 from the extrudate after 24 h immersion in 3.5% NaCl solution.
